# Supplementary material for: Simultaneous and multiplexed phenotyping of circulating exosomes with the orthogonal CRISPR–Cas platform
Source: Royal Society of Chemistry journal article supplement (doi:10.1039/d4cc00497c), 2024-01-01
Supplement: d4cc00497c1.pdf [file d4cc00497c1.pdf]

## Supplementary Information

### **Simultaneous and multiplexed phenotyping of circulating exosomes with orthogonal CRISPR-Cas platform**

Gaoxing Su,<sup>a</sup> Mengting Xu,<sup>a, b</sup> Yuedong Zhu,<sup>a</sup> Yan Zhang,<sup>a</sup> Yanan Lin,  
<sup>a</sup> Yanyan Yu <sup>\*a</sup>

<sup>a</sup> School of Pharmacy, Nantong University, Nantong, Jiangsu 226001,  
China.

<sup>b</sup> Department of pharmacy, Yixing Fifth People's Hospital, Yixing, Jiangsu  
214261, China.

Email: yuyanyan@ntu.edu.cn (Y.Y. Yu)

## **Experimental details**

### *1. Chemicals and reagents*

Streptavidin beads were purchased from Sangon Biotech (Shanghai, China). Cas12a and 10× NEBuffer 2.1 were purchased from New England Biolabs (Beijing). Cas13a and Buffer were purchased from Kemike Biotech (Wuhan). Dulbecco's modified Eagle medium (DMEM), fetal bovine serum (FBS), and PBS solution (pH 7.4) were purchased from Thermo Fisher Scientific (China). 0.25% trypsin-EDTA and antibiotics (penicillin-streptomycin) were purchased from Gibco (Grand Island, NY). The breast cancer MCF-7 cell lines were obtained from the American Type Culture Collection. All reagents were used as received without further purification. Diethyl pyrocarbonate (DEPC) treated water were purchased from Sangon biotechnology company. The oligonucleotides were designed with the help of Integrated DNA Technology and synthesized and purified by Sangon biotechnology company. The ELISA kits for CD63 and EpCAM detection were purchased from Jiangsu Meimian Industrial Co., Ltd.

### *2. Apparatus*

UV1800PC spectrophotometer (Shanghai, China) was used to quantify the nucleic acids. Fluorescence signals were recorded on a RF-5301PC (Shimadzu) fluorospectrophotometer. All DNA samples were annealed on an Applied Biosystems 96-well thermocycler. Tanon EPS300

electrophoresis apparatus was used for native polyacrylamide gel electrophoresis (PAGE). The PAGE results were imaged with a Tanon 4600SF gel imaging system under UV light.

### *3. Nucleic acids*

All DNA oligonucleotides, including 5-biotin-labeled CD63 aptamers (CD63-apt), epithelial cell adhesion molecule (EpCAM-apt), Cas12a-T, Cas13a-T, Cas13a-sgRNA, Cas12a-sgRNA, were synthesized and purified by Sangon Biotech (Shanghai, China). Tris-acetic acid-magnesium (1×TAMg) buffer (45 mM Tris-acetic acid and 7.6 mM magnesium acetate, pH 8.0) was used for all nucleic acids self-assemblies. All the nucleic acids used in this work were listed and illustrated in Table S1 and Figure S1.

### *4. Cell culture*

MCF-7 cells were cultured with DMEM complete medium. After dispersing the cells evenly in DMEM complete medium, the cell culture dish was placed in the cell culture box (37 °C humid environment, 5% CO<sub>2</sub>) for proliferation. When the cells covered 80% ~ 90% of the cell culture dish, remove the DMEM complete medium. The dish was washed twice with sterile PBS, and then a certain amount of DMEM basic medium was added before placing in the cell culture box. After 48 hours of culture, all the liquid in the cell culture dish were taken out for exosomes isolation.

### *5. Exosomes isolation and characterization*

Exosomes secreted by MCF-7 cells were isolated from the supernatant of cell culture dish by differential centrifugation. Impurities such as cells, dead cells and cell fragments were removed through 300 g centrifugation (4 °C, 10 min). Then the supernatant was subjected to centrifugation at 1000 g (4 °C, 10 min), and 10000 g (4 °C, 30 min) before purified by ultracentrifugation at 100000 g (4 °C, 70 min). The resulting supernatant was removed. The precipitate was dispersed in sterile PBS (pH 7.4) to centrifugate at 100000 g (4 °C, 70 min) again. Finally, the supernatant was removed, and the bottom precipitate was dispersed in 200  $\mu$ L sterile PBS (pH 7.4) and stored at -80 °C until use. The concentration of exosomes was determined by nanoparticle tracking analysis (NTA) and their morphology was characterized with transmission electron microscopy (TEM).

#### 6. *Native PAGE characterization*

8% native PAGE was utilized in this work. The electrophoresis was conducted in 1 $\times$  TBE buffer (89 mM Tris, 89 mM boric acid, 2 mM EDTA, pH 8.0). A constant voltage of 90 V was used for 80 min of electrophoresis before the gels were stained with 4S Red for imaging.

For the Cas13a *trans*-cleavage activity characterization: Cas13a (200 nM)/Cas13a-sgRNA (1  $\mu$ M) complex was pre-assembled in 1 $\times$  NEBuffer 2.1. After adding Cas13a-T (1  $\mu$ M) and substrate chain (ssRNA, 1  $\mu$ M), the

obtained solution was incubated at 39 °C for 40 min before subjected for native PAGE.

For the Cas12a *trans*-cleavage activity characterization: Cas12a (200 nM)/Cas12a-sgRNA (1 μM) complex was pre-assembled in 1× NEBuffer 2.1. After adding Cas12a-T (1 μM) and substrate chain (ssDNA, 1 μM), the obtained solution was incubated at 39 °C for 40 min before subjected for native PAGE characterization.

## 7. Fluorescence characterization

Validation of the *trans*-cleavage preferences of Cas13a: The Cas13a (200 nM)/Cas13a-sgRNA (1 μM) complex was pre-assembled in 1× NEBuffer 2.1. Cas12a (200 nM)/ Cas12a-sgRNA (1 μM) complex was pre-assembled in 1× NEBuffer 2.1. Subsequently, different concentrations of Cas13a-T (0 nM, 10 nM), and substrate chain (ssRNA and ssDNA, 1 μM each) were added to the Cas13a/Cas13a-sgRNA and Cas12a/Cas12a-sgRNA mixture. After 40 min incubation at 37 °C, fluorescence signal was recorded with a fluorescence spectrophotometer ( $\lambda_{ex}(\text{Cy5})$ : 643 nm ,  $\lambda_{em}(\text{Cy5})$ : 660 nm ,  $\lambda_{ex}(\text{FAM})$ : 485 nm ,  $\lambda_{em}(\text{FAM})$ : 520 nm).

Validation of the *trans*-cleavage preferences of Cas12a: The Cas13a (200 nM)/Cas13a-sgRNA (1 μM) complex was pre-assembled in 1× NEBuffer 2.1. Cas12a (200 nM)/ Cas12a-sgRNA (1 μM) complex was pre-assembled in 1× NEBuffer 2.1. Subsequently, different concentrations of Cas12a-T (0 nM, 10 nM), and substrate chain (ssRNA and ssDNA, 1 μM

each) were added to the Cas13a/Cas13a-sgRNA and Cas12a/Cas12a-sgRNA mixture. After 40 min incubation at 37 °C, fluorescence signal was recorded with a fluorescence spectrophotometer ( $\lambda_{\text{ex}}(\text{Cy5})$ : 643 nm ,  $\lambda_{\text{em}}(\text{Cy5})$ : 660 nm ,  $\lambda_{\text{ex}}(\text{FAM})$ : 485 nm ,  $\lambda_{\text{em}}(\text{FAM})$ : 520 nm).

#### 8. Optimization of experimental conditions

Optimization of reaction temperature: the Cas13a (200 nM)/Cas13a-sgRNA (1  $\mu\text{M}$ ) complex was pre-assembled in 1 $\times$  NEBuffer 2.1. The Cas12a (200 nM)/ Cas12a-sgRNA (1  $\mu\text{M}$ ) complex was pre-assembled in 1 $\times$  NEBuffer 2.1. Subsequently, Cas13a-T, Cas12a-T, and substrate chain (ssRNA and ssDNA, 1  $\mu\text{M}$  each) were added to the Cas13a/Cas13a-sgRNA and Cas12a/Cas12a-sgRNA mixture. After 40 min incubation at different temperatures (34°C, 37°C, 40°C, 43°C), fluorescence signals were recorded with a fluorescence spectrophotometer ( $\lambda_{\text{ex}}(\text{Cy5})$ : 643 nm ,  $\lambda_{\text{em}}(\text{Cy5})$ : 660 nm ,  $\lambda_{\text{ex}}(\text{FAM})$ : 485 nm ,  $\lambda_{\text{em}}(\text{FAM})$ : 520 nm).

Optimization of reaction time: Cas13a (200 nM)/Cas13a-sgRNA (1  $\mu\text{M}$ ) complex was pre-assembled in 1 $\times$  NEBuffer 2.1, the Cas12a (200 nM)/ Cas12a-sgRNA (1  $\mu\text{M}$ ) complex was pre-assembled in 1 $\times$  NEBuffer 2.1. Subsequently, Cas13a-T, Cas12a-T, and substrate chain (ssRNA and ssDNA, 1  $\mu\text{M}$  each) were added. After incubation at 40°C for different time (10 min, 20 min, 30 min, 40 min), fluorescence signals was recorded with a fluorescence spectrophotometer ( $\lambda_{\text{ex}}(\text{Cy5})$ : 643 nm ,  $\lambda_{\text{em}}(\text{Cy5})$ : 660 nm ,  $\lambda_{\text{ex}}(\text{FAM})$ : 485 nm ,  $\lambda_{\text{em}}(\text{FAM})$ : 520 nm).

### *9. Exosomes detection*

CD63apt (2  $\mu$ M) /Cas12a-T (1  $\mu$ M) or EpCAM-apt (2  $\mu$ M)/Cas13a-T (1  $\mu$ M) were annealed from 95°C to 4°C in 1 $\times$  TAMg buffer. Then streptavidin magnetic beads were added. After 1 h incubation (1 h), the magnetic beads were magnetically separated. Exosomes were then incubated with the modified magnetic beads at room temperature for 30 min. After magnetic separation, the supernatant was collected for Cas12a/Cas13a system reaction. Pre-assembled Cas13a (200 nM)/Cas13a-sgRNA (1  $\mu$ M) complex and pre-assembled Cas12a (200 nM)/Cas12a-sgRNA (1  $\mu$ M) complex was mixed before supernatant and substrate chain (ssDNA and ssRNA, 1  $\mu$ M each) addition. After incubation at 40°C for 40 min, fluorescence signal was recorded with a fluorescence spectrophotometer ( $\lambda_{ex}(\text{Cy5})$ : 643 nm ,  $\lambda_{em}(\text{Cy5})$ : 660 nm ,  $\lambda_{ex}(\text{FAM})$ : 485 nm ,  $\lambda_{em}(\text{FAM})$ : 520 nm).

### *10. Clinical serum samples detection*

Serum samples were provided by the Affiliated Hospital of Nantong University (Nantong, China). All experiments using human serum samples were performed in compliance with Nantong University's policy and ethics about human subjects. Human serum samples were collected under the consent of the donors. These samples cannot be traced back to a specific person and the authors do not know the identity of the person(s) providing

the sample. The samples were diluted with PBS before detected with the same procedure for exosome detections.

### *11. ELISA analysis*

Initially, standard samples or exosome samples, and HRP-conjugated detection antibodies were added to pre-coated wells with CD63 antibody and EpCAM, followed by an incubation at 37°C and thorough washing. Subsequently, TMB substrate was added for colour development; TMB turns blue catalyzed by horseradish peroxidase and transitions to yellow upon acidification. Lastly, the absorbance (OD value) was measured at 450nm wavelength using a spectrophotometer to calculate sample concentrations. Exosome samples were incubated with the modified magnetic beads at room temperature for 30 min, before magnetic separation and subsequent ELISA procedures.

### *12. Characterization of the detection specificity with antibody blocking methods*

To block the proteins CD63 and EpCAM on exosomes, we incubated exosomes separately with different concentrations of CD63 antibody and EpCAM antibody at 37°C overnight. Subsequently, they were incubated with the modified magnetic beads at room temperature for 30 min. Magnetic separation was then performed, and the resulting supernatant was analyzed with the Cas12a/Cas13a system.



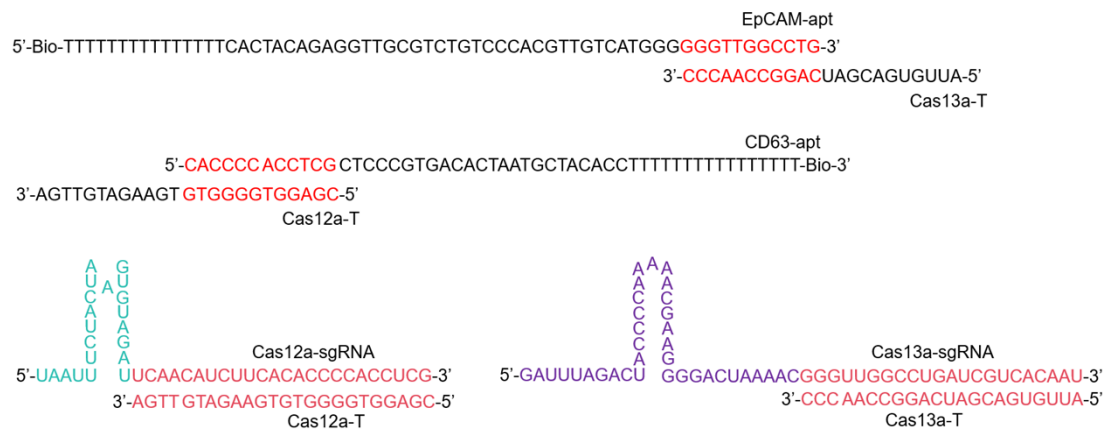

**Figure S1** Schematic illustration of the nucleic acids used in this work.

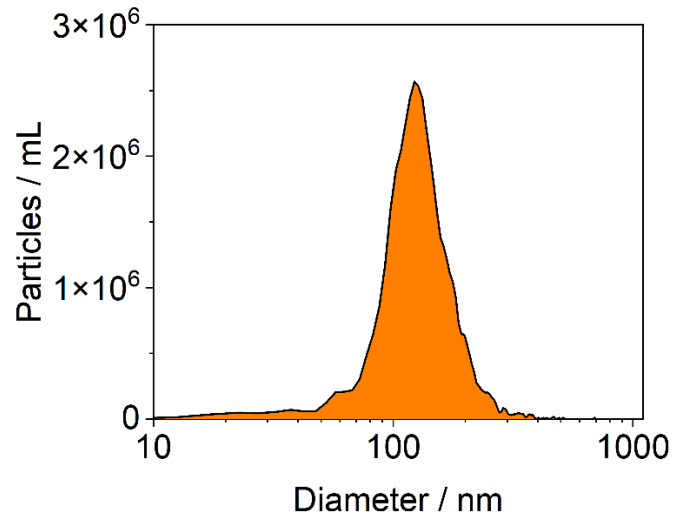

**Figure S2** NTA characterization of exosomes derived from MCF-7 cells.

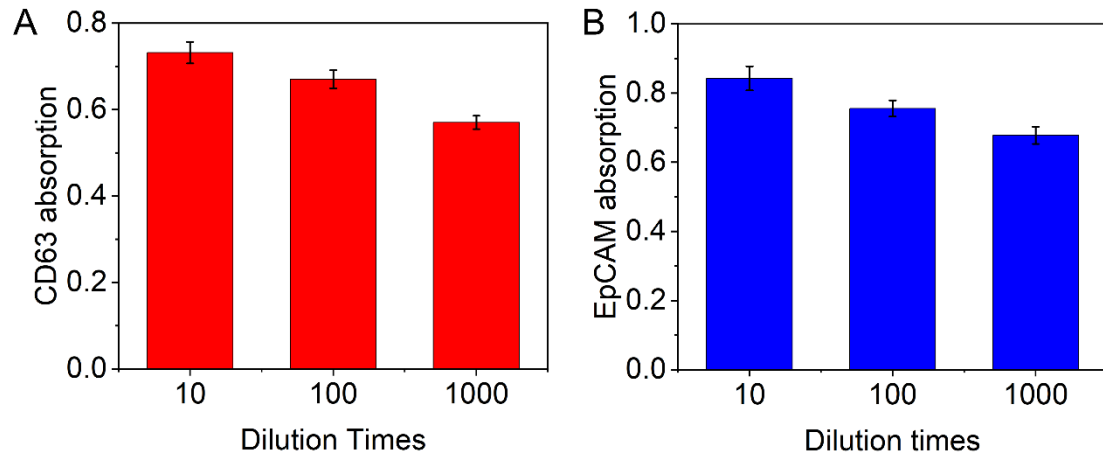

**Figure S3** Characterization of the expression of CD63 (A) and EpCAM (B) protein on the exosome surface with ELISA. The exosome stock solution was diluted different times before analyzed with CD63 and EpCAM ELISA kits, respectively. We could find the signals decreased along with the increase of exosome dilution times for both CD63 and EpCAM, demonstrating the expression of CD63 and EpCAM protein on the exosome surface.

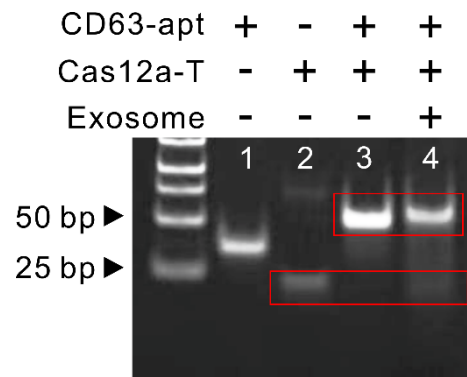

**Figure S4** PAGE characterization of the recognition capability of exosomes with CD63-apt.

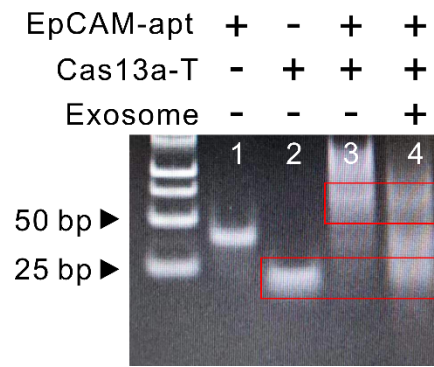

**Figure S5** PAGE characterization of the recognition capability of exosomes with EpCAM-apt.

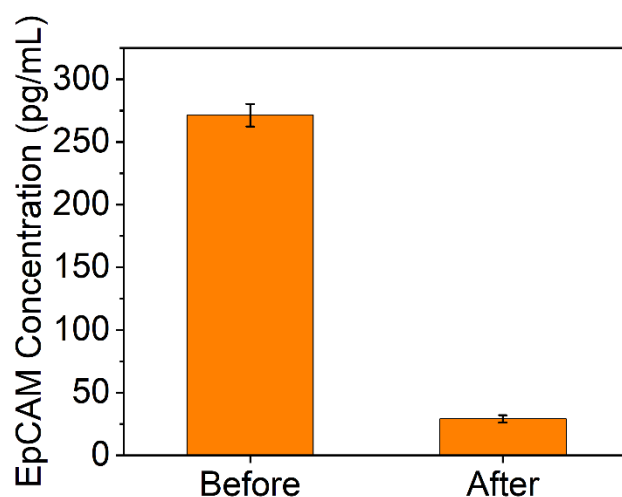

**Figure S6.** The calculated concentrations of the EpCAM protein detected through ELISA before or after incubation with the magnetic beads. Before: ccertain concentration of EVs ( $10^5$  particles/mL) was analyzed with EpCAM ELISA kit. After: the same concentration of EVs were incubated with aptamer/target functionalized magnetic beads. After magnetic separation, the EVs in supernatant were then analyzed with EpCAM ELISA kit. The EpCAM concentrations were calculated through the established linear regression curve.

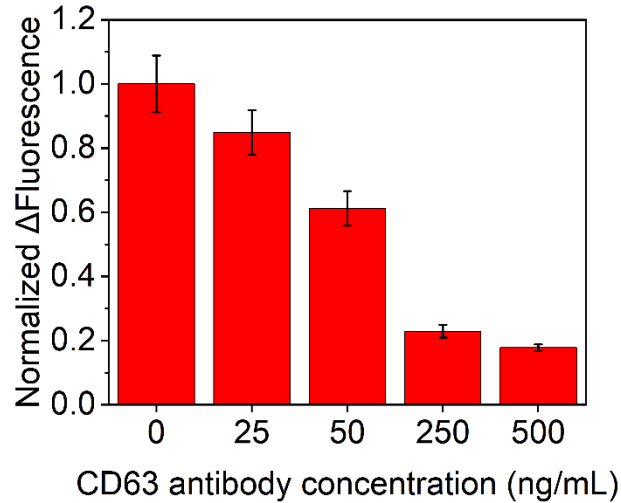

**Figure S7.** Specificity analysis using CD63 antibody blocking. We investigated whether other proteins on the exosome surface than CD63 could trigger the Cas12a cleavage. Through blocking exosome with CD63 antibody, the Cas12a fluorescence signals showed a concentration-dependent decrease, demonstrating less CD63 was available for aptamer binding. And other proteins on the exosome surface cannot be recognized by the CD63-apt. The fluorescence signals were normalized so that the highest signal was 1.

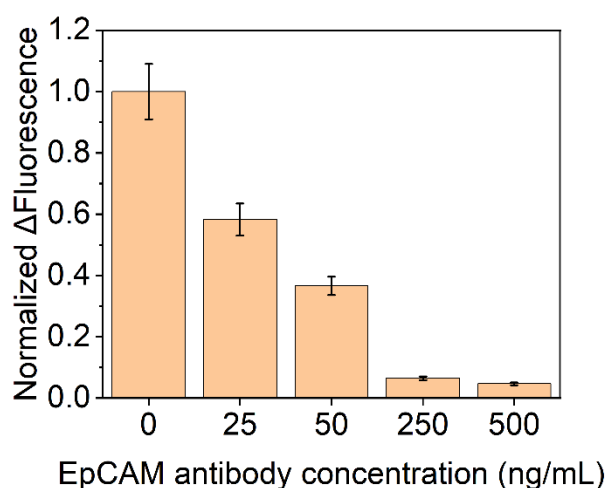

**Figure S8.** Specificity analysis using EpCAM antibody blocking. We investigated whether other proteins on the exosome surface than EpCAM could trigger the Cas13a cleavage. Through blocking exosome with EpCAM antibody, the Cas13a fluorescence signals showed a concentration-dependent decrease, demonstrating less EpCAM was available for aptamer binding. And other proteins on the exosome surface cannot be recognized by the EpCAM-apt. The fluorescence signals were normalized so that the highest signal was 1.



**Table S1** Nucleic acids used in this work.

| Oligonucleotides | Sequences (5'→3')                                                             |
|------------------|-------------------------------------------------------------------------------|
| EpCAM-apt        | Bio-<br>TTTTTTTTTTTTTTTTTCACTACAGAGGTTGCGT<br>CTGTCCCACGTTGTCATGGGGGGTTGGCCTG |
| Cas13a-T         | AUUGUGACGAUCAGGCCAACCC                                                        |
| Cas13a-sgRNA     | GAUUUAGACUACCCCAAAAACGAAGGGGA<br>CUAAAAC GG GUU GGC CUG<br>AUCGUCACAAU        |
| CD63-atp         | CACCCACCTCGCTCCCGTGACACTAATGCT<br>ACA CCTTTTTTTTTTTTTTTT-Bio                  |
| Cas12a-T         | CG AGG TGG GGT GTGAAGATGTTGA                                                  |
| Cas12a-sgRNA     | UAAUUUCUACUAAGUGUAGAUUCAACAUC<br>UUCACACCCCACCUCG                             |
| ssDNA            | 6-FAM-AATAA-HBQ1                                                              |
| ssRNA            | Cy5- UUUUU-BHQ-2                                                              |

**Table S2.** Comparison with reported methods for the exosome detection.

| No. | Method                                                 | Recognition type           | Capability of multiplex detection | Dynamic range (particles/mL)            | Reference |
|-----|--------------------------------------------------------|----------------------------|-----------------------------------|-----------------------------------------|-----------|
| 1   | Simultaneous multiplexed in situ detection of exosomal | Antibody and Nucleic acids | Yes                               | $10^5 \sim 10^9$                        | [1]       |
| 2   | Printed Divisional Optical Biochip                     | Antibody                   | Yes                               | $6 \times 10^7 \sim 6 \times 10^9$      | [2]       |
| 3   | Nanoplasmonic Sandwich Immunoassay                     | Antibody                   | No                                | $1 \times 10^3 \sim 750 \times 10^3$    | [3]       |
| 4   | DNA motor                                              | Aptamer                    | No                                | $20 \sim 2 \times 10^6$                 | [4]       |
| 5   | DNAzyme walker-amplified electrochemical method        | Aptamer                    | No                                | $5 \times 10^4 \sim 1.0 \times 10^{10}$ | [5]       |
| 6   | Orthogonal CRISPR-Cas                                  | Aptamer                    | Yes                               | $10^3 \sim 10^9$                        | Our work  |

**Table S3.** Data for Figure 4D.

|         | Cas12a |     |     | Cas13a |     |     |
|---------|--------|-----|-----|--------|-----|-----|
| Control | 124    | 115 | 100 | 155    | 181 | 163 |
| Serum   | 122    | 138 | 114 | 130    | 143 | 165 |
| Lysate  | 129    | 100 | 110 | 208    | 160 | 181 |

## References

- [1] S. Cho, H.C. Yang, W.J. Rhee, Simultaneous multiplexed detection of exosomal microRNAs and surface proteins for prostate cancer diagnosis, *Biosensors and Bioelectronics* 146 (2019).
- [2] X. Yang, Z. Zhang, Y. Wu, H. Wang, Y. Yun, Y. Sun, H. Xie, B. Bogdanov, P. Senyushkin, J. Chi, Z. Lian, D. Wu, M. Su, Y. Song, Printed Divisional Optical Biochip for Multiplex Visualizable Exosome Analysis at Point-of-Care, *Advanced Materials* (2023).
- [3] C. Wang, C.-H. Huang, Z. Gao, J. Shen, J. He, A. MacLachlan, C. Ma, Y. Chang, W. Yang, Y. Cai, Y. Lou, S. Dai, W. Chen, F. Li, P. Chen, Nanoplasmonic Sandwich Immunoassay for Tumor-Derived Exosome Detection and Exosomal PD-L1 Profiling, *Acs Sensors* 6(9) (2021) 3308-3319.
- [4] Y. Yu, W.S. Zhang, Y. Guo, H. Peng, M. Zhu, D. Miao, G. Su, Engineering of exosome-triggered enzyme-powered DNA motors for highly sensitive fluorescence detection of tumor-derived exosomes, *Biosensors and Bioelectronics* 167 (2020) 112482.
- [5] L. Zhao, R.J. Sun, P. He, X.R. Zhang, Ultrasensitive Detection of Exosomes by Target-Triggered Three-Dimensional DNA Walking Machine and Exonuclease III-Assisted Electrochemical Ratiometric Biosensing, *Analytical Chemistry* 91(22) (2019) 14773-14779.
